# Supplementary material for: Deeper Insight into Photopolymerization: The Synergy of Time-Resolved Nonuniform Sampling and Diffusion NMR
Source: PubMed Central journal article supplement (PMC9354252; doi:10.1021/jacs.2c05944), 2022-07-19
Supplement: ja2c05944_si_001.pdf [file ja2c05944_si_001.pdf]

**Supporting Information:**

**Deeper Insight into Photopolymerization: The  
Synergy of Time-Resolved Non-Uniform  
Sampling and Diffusion NMR**

Kristina Kristinaityte,<sup>†</sup> Adam Mames,<sup>†</sup> Mariusz Pietrzak,<sup>†</sup> Franz F.  
Westermair,<sup>‡</sup> Wagner Silva,<sup>‡</sup> Ruth M. Gschwind,<sup>‡</sup> Tomasz Ratajczyk,<sup>†</sup> and  
Mateusz Urbańczyk<sup>\*,†</sup>

*<sup>†</sup>Institute of Physical Chemistry, Polish Academy of Sciences, Kasprzaka 44/52, 01-224  
Warsaw, Poland*

*<sup>‡</sup>Faculty of Chemistry and Pharmacy, University of Regensburg, Universitätsstraße 31,  
93053 Regensburg, Germany*

E-mail: [murbanczyk@ichf.edu.pl](mailto:murbanczyk@ichf.edu.pl)

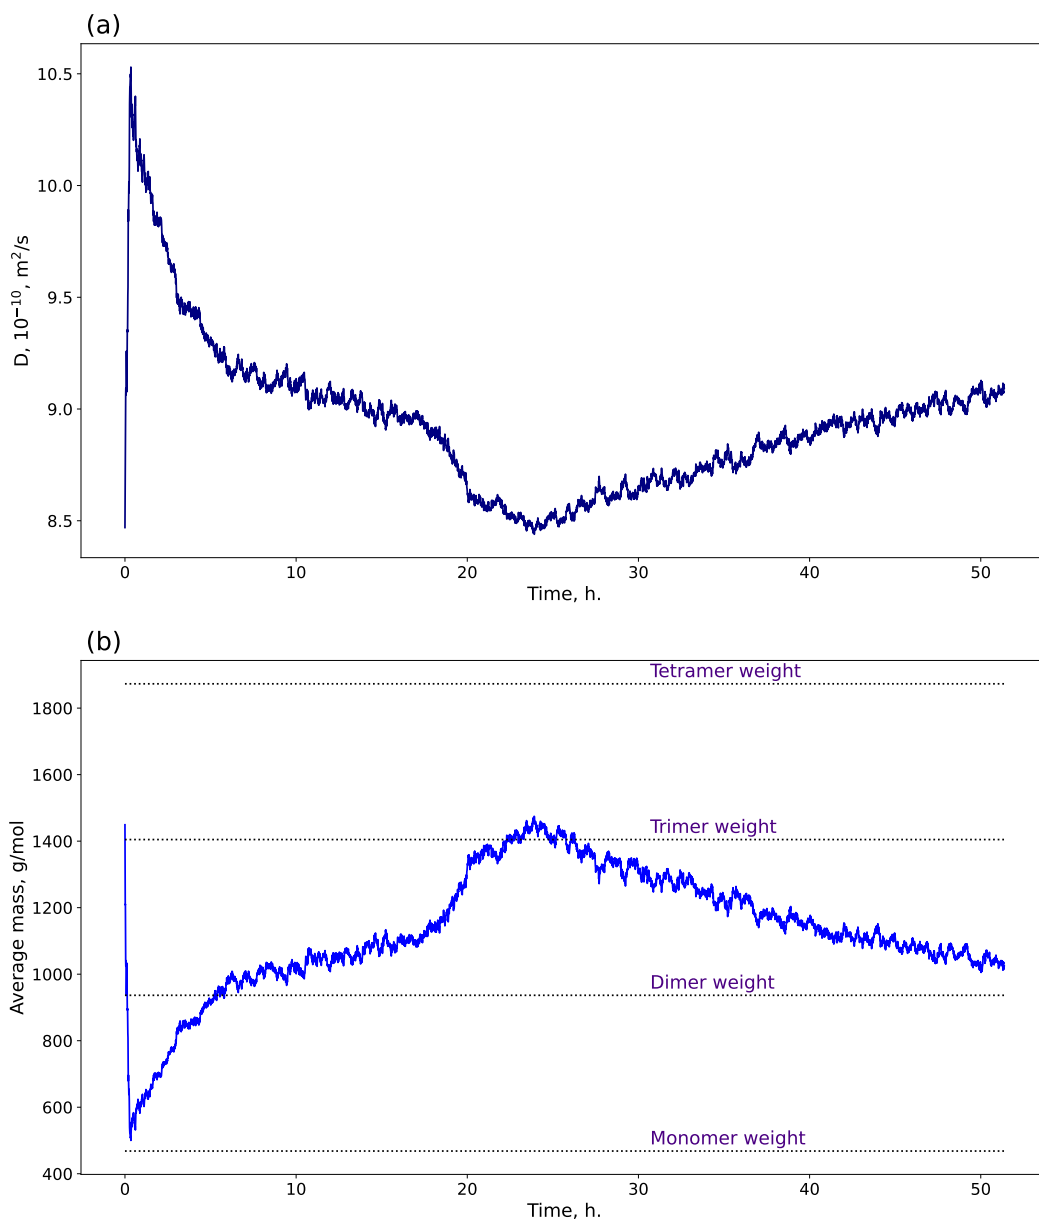

Figure SI.1: a) The diffusion coefficient time dependence calculated from sequential TR-DOSY monitoring of photo-polymerization of H2banthb; b) The average mass time dependence calculated from b). The mass calibration was done using diffusion coefficients and masses of anthracene, dimer of anthracene and H2banthb.

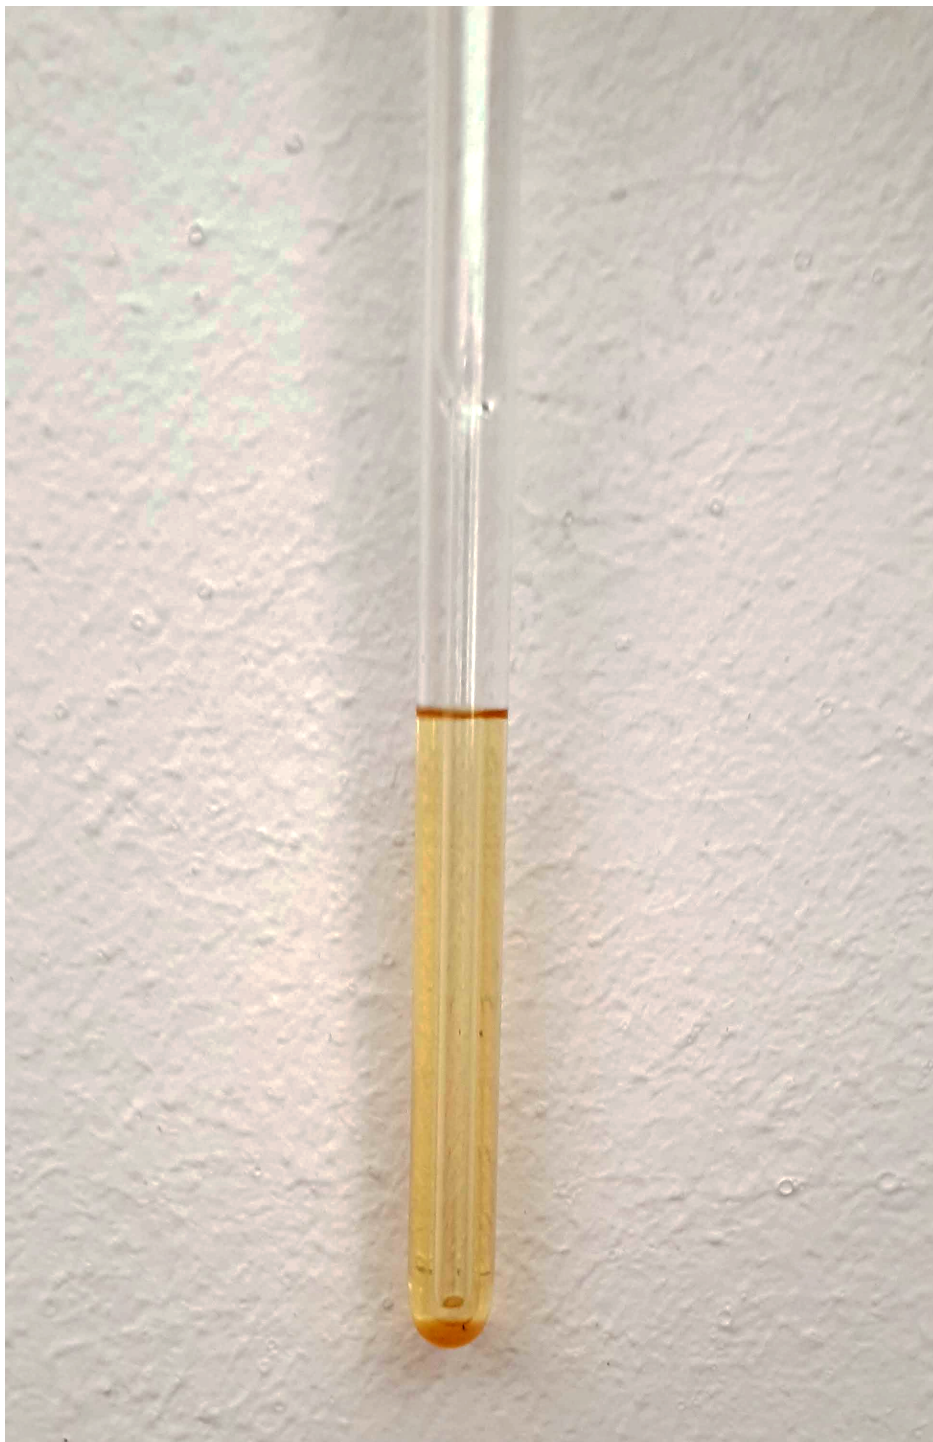

Figure SI.2: Picture of the NMR tube after reaction. On the bottom of the tube there is visible precipitate from the higher mass polymers.

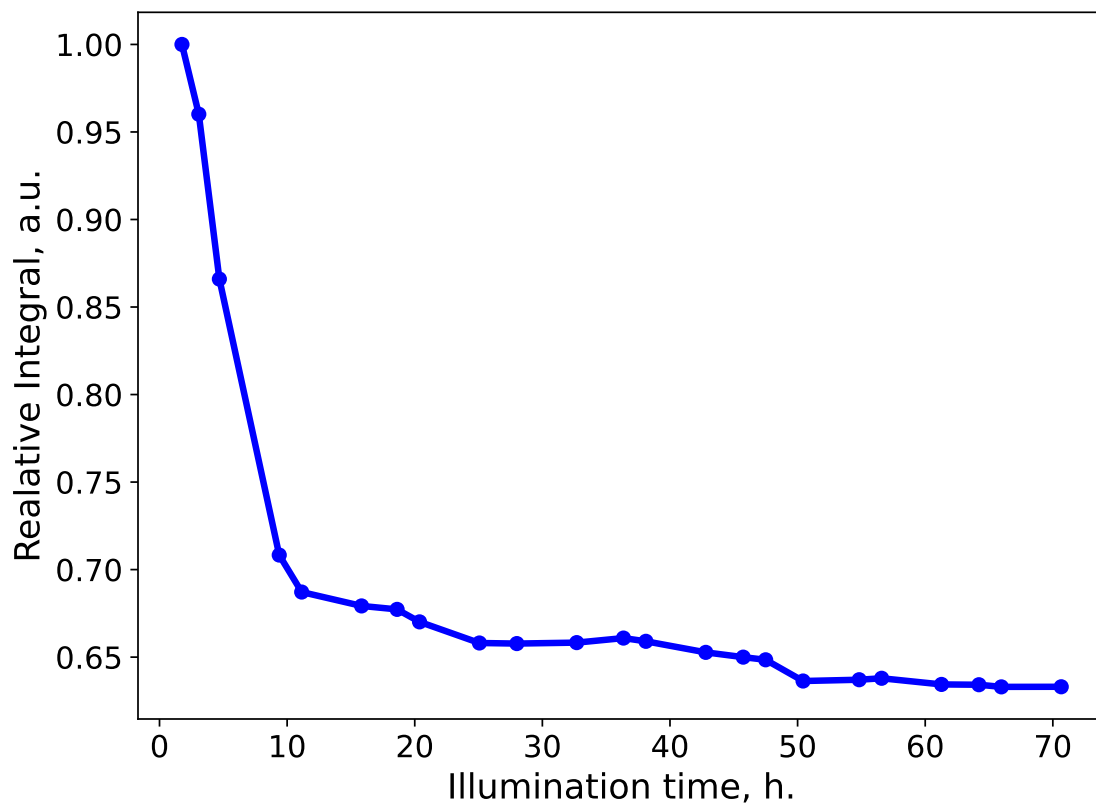

Figure SI.3: The relative integral of the  $^1\text{H}$  NMR spectrum taken from diffusion data with the lowest gradient strength.

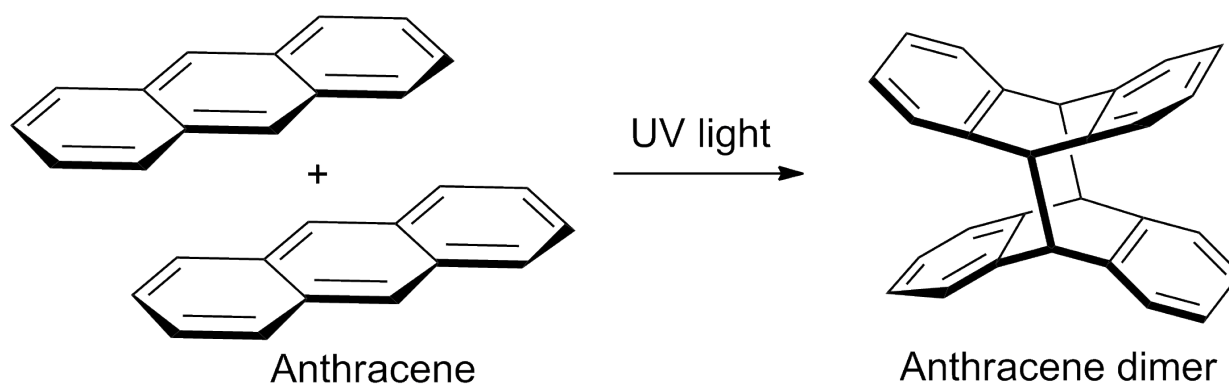

Figure SI.4: The scheme of the reaction of photo-dimerization of anthracene. Used for mass calibration.

# HRMAS of H2banthb

## Single Mass Analysis

Tolerance = 3.0 mDa / DBE: min = -1.5, max = 300.0

Element prediction: Off

Number of isotope peaks used for i-FIT = 3

Monoisotopic Mass, Even Electron Ions

20 formula(e) evaluated with 1 results within limits (up to 1000) for each mass

Elements Used:

C: 0-100

H: 0-100

N: 0-2

| Mass     | Calc. Mass | mDa  | PPM  | DBE  | Formula                                        | i-FIT | i-FIT Norm | Fit Conf % | C  | H  | N |
|----------|------------|------|------|------|------------------------------------------------|-------|------------|------------|----|----|---|
| 469.2643 | 469.2644   | -0.1 | -0.2 | 19.5 | C <sub>34</sub> H <sub>33</sub> N <sub>2</sub> | 960.3 | n/a        | n/a        | 34 | 33 | 2 |

MW00033-13a

z13\_mw0798a 7 (0.245) Cm (7:9-(1:3+25:29))

Measured by: Ailar

1: TOF MS ES+

1.70e6

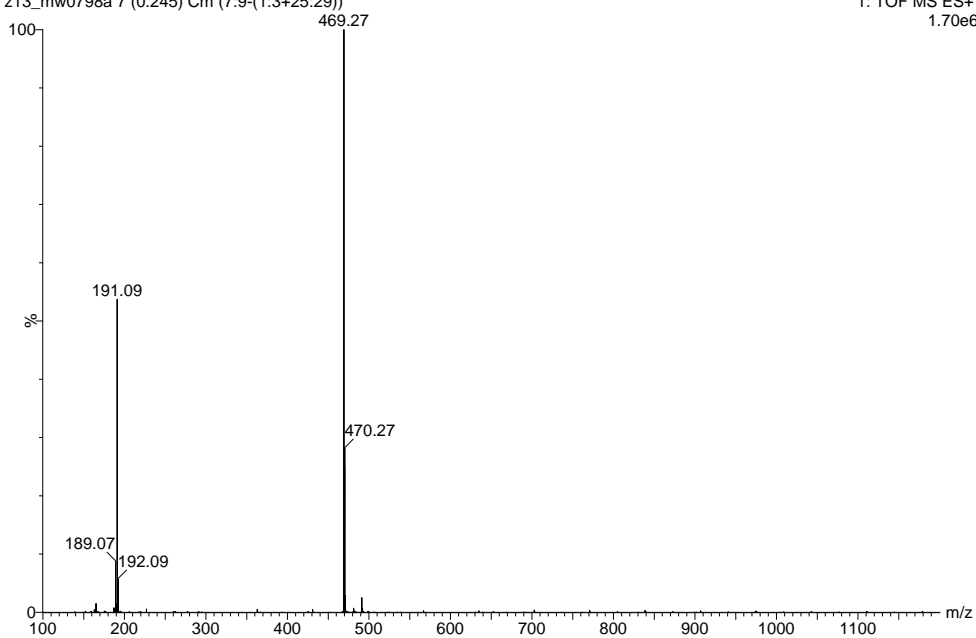

MWO0033-13a  
z13\_mw0798a 7 (0.245) Cm (7:9-(1:3+25:29))

Measured by: Ailar  
1: TOF MS ES+  
1.70e6

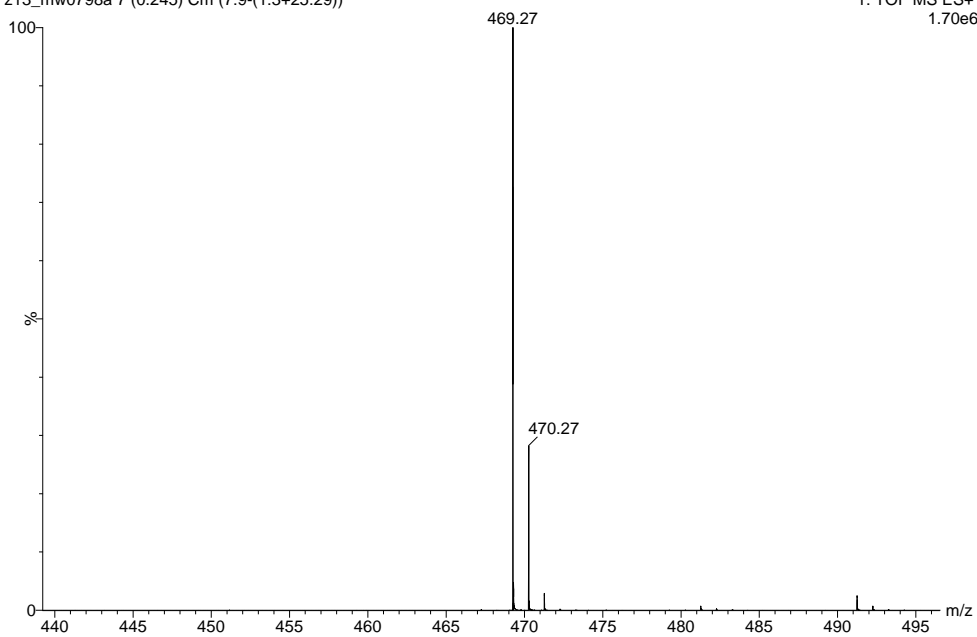

# The choice of gradient sampling

The gradient range was chosen manually based on a series of simulated diffusion decays  $7e-10, 8e-10, 9e-10, 8.5e-10, 1e-9 \text{ m}^2/s$ . The sampling was chosen to be exponential and to guarantee the best separation of decays for aforementioned diffusion coefficients (See Figure SI.5).

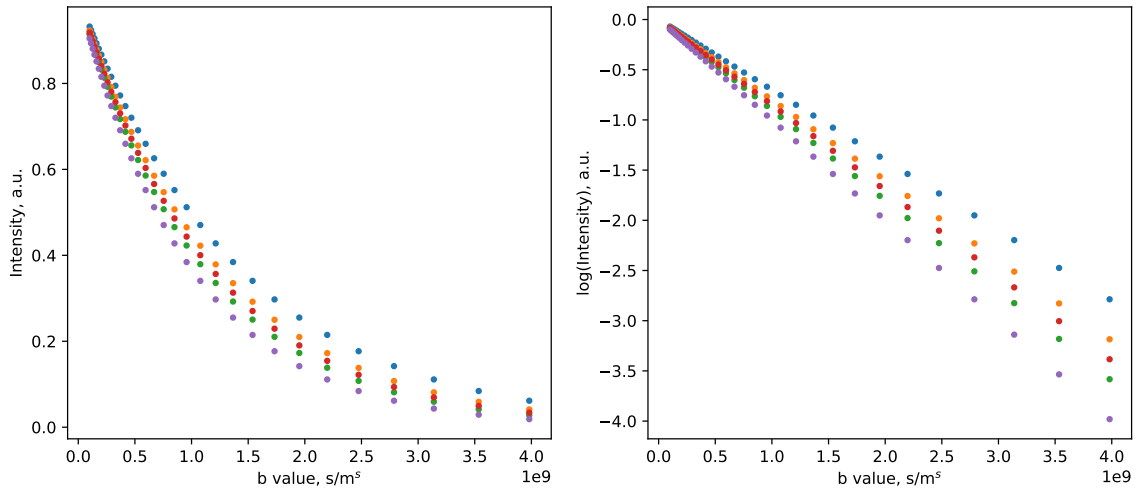

Figure SI.5: The simulated decays of the diffusion coefficients:  $7e-10, 8e-10, 9e-10, 8.5e-10, 1e-9 \text{ m}^2/s$

# Pulse sequences used

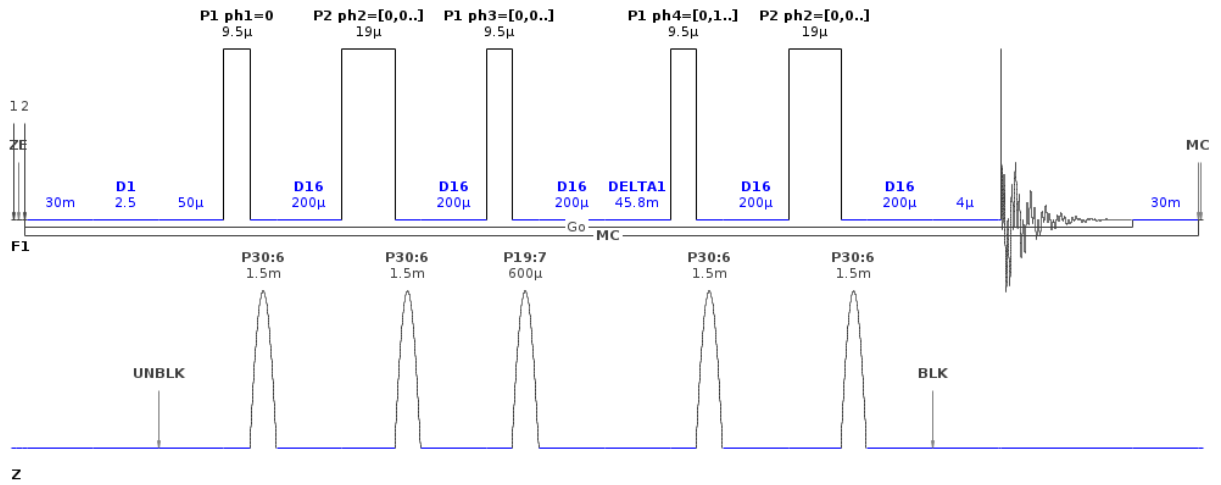

Figure SI.6: Pulse sequence: stebpp1s1d



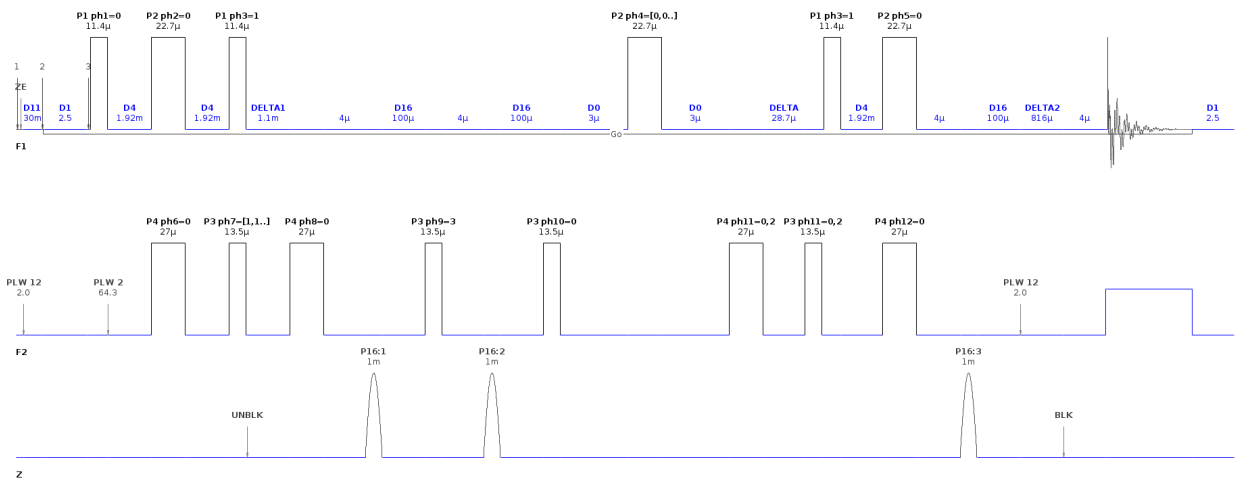

Figure SI.7: Pulse sequence: hsqcgpph

## Acquisition code based on TReNDS:

```

1  #!/usr/local/bin/jython
2  # -*- coding: utf-8 -*-
3  import os
4  import shutil
5  import threading
6  import time
7  import datetime
8  from java.awt import *
9  from javax.swing import *
10 from javax.swing.filechooser import FileNameExtensionFilter
11
12
13 class TopTReND(JFrame):

```

```

14     def __init__(self):
15         super(TopTREND, self).__init__()
16         self.initUI()
17
18     def initUI(self):
19         stepsTXT = JLabel('Steps for IL acquisition:  ')
20         Spacer1 = JLabel(' \n')
21         Exp1 = JLabel('\n\n\n*****2D exp No
↳ 1*****\n\n\n')
22         Exp2 = JLabel('\n*****2D exp No
↳ 2*****\n')
23         Exp3 = JLabel('\n*****2D exp No
↳ 3*****\n')
24         ExpTR = JLabel('\n*****TR DOSY exp
↳ *****\n')
25
26         Spacer = JLabel(' \n\n *****\n\n
↳ ')
27         Spacer2 = JLabel(' \n\n *****\n\n
↳ ')
28         numof = JLabel('Number of 2D exp:  ')
29         self.samp = JButton('Choose sampling schedule',
↳ actionPerformed=self.FileChooser)
30         self.samp2 = JButton('Choose sampling schedule',
↳ actionPerformed=self.FileChooser2)
31         self.samp3 = JButton('Choose sampling schedule',
↳ actionPerformed=self.FileChooser3)

```

```

32 self.Patern2D = JButton('Choose experiment to be used as 2D
    ↪ template', actionPerformed=self.TwodimPatern)
33 self.Patern2D_1 = JButton('Choose experiment to be used as 2D
    ↪ template', actionPerformed=self.TwodimPatern2)
34 self.Patern2D_2 = JButton('Choose experiment to be used as 2D
    ↪ template', actionPerformed=self.TwodimPatern3)
35 self.Patern2D_tr = JButton('Choose experiment to be used as TR DOSY
    ↪ template', actionPerformed=self.TwodimPaternTR)
36 self.sampTR = JButton('Choose sampling schedule',
    ↪ actionPerformed=self.FileChooserTR)
37
38 self.Patern1D = JButton('Choose experiment to be used as 1D
    ↪ template', actionPerformed=self.OnedimPatern)
39 self.SaveDir = JButton('Choose Directory to save data',
    ↪ actionPerformed=self.DirChooser)
40 self.RunBTN = JButton('Start Acquisition!',
    ↪ actionPerformed=self.onRunt)
41 self.StopBTN = JButton('Stop Acquisition!',
    ↪ actionPerformed=self.onStop)
42 self.StopBTN.setEnabled(False)
43 spin2 = SpinnerNumberModel(100.0, 1.0, 999999.0, 1.0)
44 spin = SpinnerNumberModel(1.0, 1.0, 3.0, 1.0)
45 self.numofexp = JSpinner(spin)
46 self.steps = JSpinner(spin2)
47 self.twodionly = JCheckBox('2D acquisition only')
48 self.setTitle('TReNDS Acquisition module for TopSpin with TR-DOSY')
    ↪ # create window with title
49 self.setSize(600, 700) # set window size x, y

```

```

50     self.panel1 = JPanel()
51     self.panel2 = JPanel()
52     self.panel4 = JPanel()
53     self.panel1.setAlignmentX(Component.LEFT_ALIGNMENT)
54     self.panel2.setAlignmentX(Component.LEFT_ALIGNMENT)
55     self.panel4.setAlignmentX(Component.LEFT_ALIGNMENT)
56     layoutout1 = BorderLayout(self.panel1, BorderLayout.Y_AXIS)
57     layoutout2 = BorderLayout(self.panel2, BorderLayout.X_AXIS)
58     layoutout3 = BorderLayout(self.panel4, BorderLayout.X_AXIS)
59     self.panel1.setLayout(layoutout1)
60     self.panel2.setLayout(layoutout2)
61     self.panel4.setLayout(layoutout3)
62     self.setLayout(FlowLayout()) # layout manager for horizontal
    ↪ alignment
63     self.add(self.panel1)
64     self.panel1.add(self.panel2)
65     self.panel1.add(JLabel('\n'))
66     self.panel1.add(self.Patern1D)
67     self.panel1.add(self.twodionly)
68     self.panel1.add(JLabel('\n'))
69     self.panel1.add(Exp1)
70     self.panel1.add(JLabel('\n'))
71     self.panel1.add(self.samp)
72     self.panel1.add(self.Patern2D)
73     self.panel1.add(JLabel('\n'))
74     self.panel1.add(Exp2)
75     self.panel1.add(JLabel('\n'))
76     self.panel1.add(self.samp2)

```

```

77     self.panel1.add(self.Patern2D_1)
78     self.panel1.add(JLabel('\n'))
79     self.panel1.add(Exp3)
80     self.panel1.add(JLabel('\n'))
81     self.panel1.add(self.samp3)
82     self.panel1.add(self.Patern2D_2)
83     self.panel1.add(JLabel('\n'))
84     self.panel1.add(ExpTR)
85     self.panel1.add(JLabel('\n'))
86     self.panel1.add(self.sampTR)
87     self.panel1.add(self.Patern2D_tr)
88     self.panel1.add(JLabel('\n'))
89     self.panel1.add(Spacer2)
90     self.panel1.add(JLabel('\n'))
91     self.panel1.add(self.SaveDir)
92     self.panel1.add(Spacer1)
93     self.panel1.add(Spacer)
94     self.panel1.add(self.panel4)
95     self.panel4.add(self.RunBTN)
96     self.panel4.add(JLabel('\t'))
97     self.panel4.add(self.StopBTN)
98     self.panel2.add(stepsTXT)
99     self.panel2.add(self.steps)
100    self.panel2.add(numof)
101    self.panel2.add(self.numofexp)
102    self.setDefaultCloseOperation(JFrame.DISPOSE_ON_CLOSE)
103    self.setVisible(True)
104    self.setAlwaysOnTop(True)

```

```

105
106 def FileChooser(self, e):
107     self.setAlwaysOnTop(False)
108
109     chooseFile = JFileChooser()
110     filter1 = FileNameExtensionFilter("sampling schedule", [".sch"])
111     chooseFile.addChoosableFileFilter(filter1)
112
113     ret = chooseFile.showDialog(JPanel(), "Choose file")
114
115     if ret == JFileChooser.APPROVE_OPTION:
116         file = chooseFile.getSelectedFile()
117         self.sampfile = file.getCanonicalPath()
118         mes = "Sampling file: " + self.sampfile + " have been chosen"
119         SHOW_STATUS(message=mes)
120         self.samp.setText(mes)
121         self.setAlwaysOnTop(True)
122
123 def FileChooser2(self, e):
124     self.setAlwaysOnTop(False)
125
126     chooseFile = JFileChooser()
127     filter1 = FileNameExtensionFilter("sampling schedule", [".sch"])
128     chooseFile.addChoosableFileFilter(filter1)
129
130     ret = chooseFile.showDialog(JPanel(), "Choose file")
131
132     if ret == JFileChooser.APPROVE_OPTION:

```

```

133         file = chooseFile.getSelectedFile()
134         self.sampfile2 = file.getCanonicalPath()
135         mes = "Sampling file: " + self.sampfile + " have been chosen"
136         SHOW_STATUS(message=mes)
137         self.samp2.setText(mes)
138         self.setAlwaysOnTop(True)
139
140     def FileChooser3(self, e):
141         self.setAlwaysOnTop(False)
142
143         chooseFile = JFileChooser()
144         filter1 = FileNameExtensionFilter("sampling schedule", [".sch"])
145         chooseFile.addChoosableFileFilter(filter1)
146
147         ret = chooseFile.showDialog(JPanel(), "Choose file")
148
149         if ret == JFileChooser.APPROVE_OPTION:
150             file = chooseFile.getSelectedFile()
151             self.sampfile3 = file.getCanonicalPath()
152             mes = "Sampling file: " + self.sampfile + " have been chosen"
153             SHOW_STATUS(message=mes)
154             self.samp3.setText(mes)
155             self.setAlwaysOnTop(True)
156
157     def FileChooserTR(self, e):
158         self.setAlwaysOnTop(False)
159
160         chooseFile = JFileChooser()

```

```

161     filter1 = FileNameExtensionFilter("gradient schedule", [".txt"])
162     chooseFile.addChoosableFileFilter(filter1)
163
164     ret = chooseFile.showDialog(JPanel(), "Choose file")
165
166     if ret == JFileChooser.APPROVE_OPTION:
167         file = chooseFile.getSelectedFile()
168         self.sampfileTR = file.getCanonicalPath()
169         mes = "Sampling file: " + self.sampfileTR + " have been chosen"
170         SHOW_STATUS(message=mes)
171         self.sampTR.setText(mes)
172     self.setAlwaysOnTop(True)
173     def DirChooser(self, e):
174         self.setAlwaysOnTop(False)
175
176         chooseFile = JFileChooser()
177         chooseFile.setFileSelectionMode(JFileChooser.DIRECTORIES_ONLY)
178         filter1 = FileNameExtensionFilter("sampling schedule", [".sch"])
179         chooseFile.addChoosableFileFilter(filter1)
180
181         ret = chooseFile.showDialog(JPanel(), "Choose file")
182
183         if ret == JFileChooser.APPROVE_OPTION:
184             file = chooseFile.getSelectedFile()
185
186             self.dirsave = file.getCanonicalPath()
187             mes = "Acquired data will be saved in : " + self.dirsave + "
↪ directory"

```



```

188     SHOW_STATUS(message=mes)
189     self.SaveDir.setText(mes)
190     self.setAlwaysOnTop(True)
191
192     # def TwodimTemp(e):
193     # def TwodimTemp(e):
194
195 def TwodimPatern(self, e):
196     self.setAlwaysOnTop(False)
197
198     self.twodimpath = DATASET_DIALOG(
199         "Choose 2D experiment pattern (DO NOT USE FIND OPTION!)" #
200         ↪ PROBLEM WITH FIND BUTTON!!!
201     mes = '2D template is: ' + self.twodimpath[3] + '/' +
202     ↪ self.twodimpath[0] + '/' + self.twodimpath[1] + '/' + \
203         self.twodimpath[2]
204     SHOW_STATUS(message=mes)
205     # DATASET_DIALOG("Choose 1D experiment pattern", CURDATA())
206     self.Patern2D.setText(mes)
207     self.setAlwaysOnTop(True)
208
209 def TwodimPatern2(self, e):
210     self.setAlwaysOnTop(False)
211
212     self.twodimpath2 = DATASET_DIALOG(
213         "Choose 2D experiment pattern (DO NOT USE FIND OPTION!)" #
214         ↪ PROBLEM WITH FIND BUTTON!!!

```

```

212     mes = '2D template is: ' + self.twodimpath2[3] + '/' +
↪     self.twodimpath2[0] + '/' + self.twodimpath2[1] + '/' + \
213         self.twodimpath2[2]
214     SHOW_STATUS(message=mes)
215     # DATASET_DIALOG("Choose 1D experiment pattern", CURDATA())
216     self.Patern2D_1.setText(mes)
217     self.setAlwaysOnTop(True)
218
219     def TwodimPaternTR(self, e):
220         self.setAlwaysOnTop(False)
221
222         self.twodimpathTR = DATASET_DIALOG(
223             "Choose 2D experiment pattern (DO NOT USE FIND OPTION!)" #
↪             PROBLEM WITH FIND BUTTON!!!
224     mes = '2D template is: ' + self.twodimpathTR[3] + '/' +
↪     self.twodimpathTR[0] + '/' + self.twodimpathTR[1] + '/' + \
225         self.twodimpathTR[2]
226     SHOW_STATUS(message=mes)
227     # DATASET_DIALOG("Choose 1D experiment pattern", CURDATA())
228     self.Patern2D_tr.setText(mes)
229     self.setAlwaysOnTop(True)
230     def TwodimPatern3(self, e):
231         self.setAlwaysOnTop(False)
232
233         self.twodimpath3 = DATASET_DIALOG(
234             "Choose 2D experiment pattern (DO NOT USE FIND OPTION!)" #
↪             PROBLEM WITH FIND BUTTON!!!

```

```

235     mes = '2D template is: ' + self.twodimpath3[3] + '/' +
        ↪ self.twodimpath3[0] + '/' + self.twodimpath3[1] + '/' + \
236         self.twodimpath3[2]
237     SHOW_STATUS(message=mes)
238     # DATASET_DIALOG("Choose 1D experiment pattern", CURDATA())
239     self.Patern2D_2.setText(mes)
240     self.setAlwaysOnTop(True)
241
242     # self.twodimpath=DATASET_DIALOG("Choose 1D experiment pattern",
        ↪ CURDATA())
243
244     def OnedimPatern(self, e):
245         self.setAlwaysOnTop(False)
246
247         self.onedimpath = DATASET_DIALOG("Choose 1D experiment pattern (DO
        ↪ NOT USE FIND OPTION!)")
248         mes = '1D template is: ' + self.onedimpath[3] + '/' +
        ↪ self.onedimpath[0] + '/' + self.onedimpath[1] + '/' + \
249         self.onedimpath[2]
250         SHOW_STATUS(message=mes)
251         # DATASET_DIALOG("Choose 1D experiment pattern", CURDATA())
252         # self.twodimpath=DATASET_DIALOG("Choose 1D experiment pattern",
        ↪ CURDATA())
253         self.Patern1D.setText(mes)
254         self.setAlwaysOnTop(True)
255
256     def onStop(self, e):
257         self.eventkill.set()

```

```

258     self.StopBTN.setEnabled(False)
259     self.RunBTN.setEnabled(True)
260     self.RunBTN.setText("Start Acquisition")
261
262     def onRunt(self, e):
263         self.StopBTN.setEnabled(True)
264         twoditemp = self.twodimpath
265         if self.numofexp.getValue() < 3:
266             self.sampfile3 = ''
267             self.twodimpath3 = ''
268         if self.numofexp.getValue() < 2:
269             self.sampfile2 = ''
270             self.twodimpath2 = ''
271         if self.twodionly.isSelected():
272             self.onedimpath = ''
273         self.eventkill = threading.Event()
274         self.first = threading.Thread(target=self.acquisitionloop,
275                                     args=(self.steps.getValue(),
276                                           ↪ self.sampfile, self.twodimpathTR,
277                                           ↪ self.twodimpath, self.onedimpath,
278                                           self.dirsave,
279                                           ↪ self.twodionly.isSelected(),
280                                           ↪ self.sampfile2,
281                                           ↪ self.sampfile3,
282                                           ↪ self.sampfileTR,
283                                           self.twodimpath2,
284                                           ↪ self.twodimpath3,
285                                           ↪ self.numofexp.getValue(),

```

```

278             self.eventkill))
279
280     # first.setDaemon(True)
281
282     self.first.start()
283
284
285 def acquisitionloop(self, steps, sampfile, twoditempTR, twoditemp,
286 ↪ oneditemp, SaveDir, TwoDiOnly, sampfile2, sampfile3, sampfileTR,
287 ↪ twoditemp2, twoditemp3, numofexp, eventkill):
288
289     self.RunBTN.setEnabled(False)
290
291     self.create_interleave_file_structure(SaveDir, numofexp) # creates
292 ↪ subfolders like Acquired/1D Acquired/2D
293
294     # with open(sampfile) as f:
295
296     #     schedule1 = f.readlines()
297
298     f = open(sampfile, 'r')
299
300     schedule1 = f.readlines()
301
302     f.close()
303
304     f = open(sampfileTR, 'r')
305
306     scheduleTR = f.readlines()
307
308     f.close()
309
310     shutil.copy2(sampfileTR, SaveDir + '/Acquired/DOSY/gradients.txt')
311
312
313     shutil.copy2(sampfile, SaveDir + '/Acquired/2D/sampling.sch')
314
315     if int(numofexp) == 3:
316
317         shutil.copy2(sampfile3, SaveDir + '/Acquired/2D_2/sampling.sch')
318
319         # with open(sampfile3) as f:
320
321         #     schedule3 = f.readlines()
322
323         f = open(sampfile3, 'r')
324
325         schedule3 = f.readlines()
326
327         f.close()

```

```

304     if int(numofexp) == 3 or int(numofexp) == 2:
305         shutil.copy2(sampfile2, SaveDir + '/Acquired/2D_1/sampling.sch')
306         # with open(sampfile2) as f:
307         #     schedule2 = f.readlines()
308         f = open(sampfile2, 'r')
309         schedule2 = f.readlines()
310         f.close()
311     W = 0
312     itr=0
313     for i in xrange(2, 2 * int(steps) + 2, 2):
314
315
316         if not eventkill.wait(1):
317             # txtbtn = "Acq. running. Step " + str(i / 2) + "/" +
318             ↪ str(steps)
319             # self.RunBTN.setText(txtbtn)
320             for k in range(0, int(numofexp)):
321                 mess = "Step" + str(i / 2)
322                 #SHOW_STATUS(message=str(schedule[i]))
323
324                 time.sleep(5)
325                 txtbtn = "Acq. running. Step " + str(i / 2) + "/" +
326                 ↪ str(steps)
327                 self.RunBTN.setText(txtbtn)
328                 # start 2D
329                 if k == 0:
330                     schedule = schedule1

```

```

329     self.copydataTo(twoditemp, SaveDir + '/Acquired',
    ↪ '2D', i / 2)
330     self.openFolderPath(SaveDir + '/Acquired/2D/' + str(i
    ↪ / 2) + '/pdata/' + twoditemp[2])
331     time.sleep(5)
332     fname = SaveDir + '/Acquired/2D/' + str(i / 2) +
    ↪ '/nusILlist'
333     elif k == 1:
334         schedule = schedule2
335         self.copydataTo(twoditemp2, SaveDir + '/Acquired',
    ↪ '2D_1', i / 2)
336         self.openFolderPath(SaveDir + '/Acquired/2D_1/' +
    ↪ str(i / 2) + '/pdata/' + twoditemp2[2])
337         time.sleep(5)
338         fname = SaveDir + '/Acquired/2D_1/' + str(i / 2) +
    ↪ '/nusILlist'
339     elif k == 2:
340         schedule = schedule3
341         self.copydataTo(twoditemp3, SaveDir + '/Acquired',
    ↪ '2D_2', i / 2)
342         self.openFolderPath(SaveDir + '/Acquired/2D_2/' +
    ↪ str(i / 2) + '/pdata/' + twoditemp3[2])
343         time.sleep(5)
344         fname = SaveDir + '/Acquired/2D_2/' + str(i / 2) +
    ↪ '/nusILlist'
345     f = open(fname, 'w+')
346     f.write(schedule[W])

```

```

347         f.write(schedule[W + 1]) # retest it when the new
        → generator is ready
348     f.close()
349     try:
350         topspin_path = sys.getenv()['XWINNMRHOME'] #
        → topspin < 3,1
351     except:
352         topspin_path = sys.registry['XWINNMRHOME'] # topspin
        → > 3.1
353     f = open(topspin_path +
        → '/exp/stan/nmr/lists/vc/trendnls.txt', 'w+')
354     f.write(schedule[W])
355     f.write(schedule[W + 1]) # retest it when the new
        → generator is ready
356     # self.RunBTN.setText(str(schedule[i/2]))
357     f.close()
358     self.sendcommand('fntype non-uniform_sampling')
359     self.sendcommand('NUSpoints 2')
360     self.sendcommand('DS 0')
361     self.putpar('NUSLIST', 'trendnls.txt') # ON test xcmd
        → gives error so putpar is safer
362     time.sleep(5)
363     self.sendcommand('zg')
364     time.sleep(10)
365     if k == 0:
366         self.acqtest(i, '2D',

```



```

367         SaveDir) # KEEPS loop with sleep until
                ↳ audita.txt shows that acquisition is
                ↳ running

368     elif k == 1:
369         self.acqtest(i, '2D_1',
370         SaveDir) # KEEPS loop with sleep until
                ↳ audita.txt shows that acquisition is
                ↳ running

371     elif k == 2:
372         self.acqtest(i, '2D_2',
373         SaveDir) # KEEPS loop with sleep until
                ↳ audita.txt shows that acquisition is
                ↳ running

374
375     W += 2
376     if not TwoDiOnly:
377         self.copydataTo(oneditemp, SaveDir + '/Acquired', '1D', i
                ↳ / 2)
378         self.openFolderPath(SaveDir + '/Acquired/1D/' + str(i /
                ↳ 2) + '/pdata/' + oneditemp[2])
379         time.sleep(10)
380         self.sendcommand('zg')
381         time.sleep(10)
382         self.acqtest(i, '1D', SaveDir)
383     # TR DOSY part
384     self.copydataTo(twoditempTR, SaveDir + '/Acquired', 'DOSY', i
                ↳ / 2)

```

```

385     self.openFolderPath(SaveDir + '/Acquired/DOSY/' + str(i / 2)
↪ + '/pdata/' + twoditemp[2])
386     time.sleep(5)
387
388     self.sendcommand('GPZ6 ' +str(scheduleTR[itr][:-3]))
389     time.sleep(5)
390     itr+=1
391     self.sendcommand('zg')
392     time.sleep(10)
393
394     self.acqtest(i, 'DOSY', SaveDir)
395
396     # fname = SaveDir + '/Acquired/2D/' + str(i / 2) +
↪ '/nusILLlist'
397
398     self.RunBTN.setText("Acquisition Complete")
399     self.RunBTN.setEnabled(True)
400
401     def acqtest(self, i, Mode, SaveDir):
402         AcqActive = True
403         while AcqActive:
404             if 'acquisition in progress' in open(SaveDir + '/Acquired/' +
↪ Mode + '/' + str(
405                 i / 2) + '/audita.txt').read():
406                 SHOW_STATUS('Acquisition in progress')
407                 time.sleep(10)
408             else:
409                 AcqActive = False

```

```

410         SHOW_STATUS('Acquisition step finished. Next step')
411
412     def openFolder(self, folderM):
413
414         com = 'RE(["'
415         for l in range(0, 3):
416             com += folderM[l] + '",'
417             com += folderM[l + 1] + '"],"y")'
418         SHOW_STATUS(message=com)
419         EXEC_PYSCRIPT(com)
420
421     def openFolderPath(self, folderM):
422         com = 'RE_PATH("' + folderM + '"],"y")'
423         EXEC_PYSCRIPT(com)
424
425     def savePath(self, folder):
426         com = 'WR_PATH("' + folder + '"],"y")'
427         EXEC_PYSCRIPT(com)
428
429     def sendcommand(self, command):
430         com = 'XCMD("' + command + '"],1)'
431         EXEC_PYSCRIPT(com)
432
433     def putpar(self, command, path):
434         com = 'PUTPAR("' + command + '",' + '"' + path + '")'
435         EXEC_PYSCRIPT(com)
436

```

```

437 def copydataTo(self, Source, Destination, Mode, counter): # Mode 2D vs
    ↪ 1D counter is from loop
438     Source = Source[3] + '/' + Source[0] + '/' + Source[1] + '/'
439     # SHOW_STATUS(message=Source)
440     # self.openFolder(self, Source)
441     Destination += '/' + Mode + '/' + str(counter)
442     # SHOW_STATUS(message=Destination)
443     # # time.sleep(5)
444     shutil.copypath(Source, Destination)
445
446     # self.savePath(Destination)
447     # # time.sleep(5)
448     if Mode == '1D':
449         try:
450             os.remove(Destination + '/fid')
451         except:
452             pass
453     elif Mode == '2D':
454         try:
455             os.remove(Destination + '/ser')
456         except:
457             pass
458     SHOW_STATUS(message='Acq structure created in: ' + Destination)
459
460
461 def create_interleave_file_structure(self, Directory, numofexp):
462     # Directory=check_if_dir(Directory)
463     # Creates the folder structure for saving the data in Directory

```

```

464     if not (os.path.isdir(Directory)):
465         os.makedirs(Directory)
466         os.makedirs(Directory + '/Acquired')
467
468         os.makedirs(Directory + '/Acquired/1D')
469         os.makedirs(Directory + '/Acquired/2D')
470         os.makedirs(Directory + '/Acquired/DOSY')
471
472     else:
473
474         if not (os.path.isdir(Directory + '/Acquired')):
475             os.makedirs(Directory + '/Acquired')
476             os.makedirs(Directory + '/Acquired/1D')
477             os.makedirs(Directory + '/Acquired/2D')
478             os.makedirs(Directory + '/Acquired/DOSY')
479
480         else:
481             os.rename(Directory + '/Acquired',
482                       Directory +
483                       ↪ '/Acquired_back_at{:Y_%b_%d_%H_%M_%S}'.format(
484                           datetime.datetime.now()))
485             os.makedirs(Directory + '/Acquired')
486             if not (os.path.isdir(Directory + '/Acquired/1D')):
487                 os.makedirs(Directory + '/1D')
488             if not (os.path.isdir(Directory + '/Acquired/2D')):
489                 os.makedirs(Directory + '/Acquired/2D')
490             if int(numofexp) == 2 or int(numofexp) == 3:
491                 if not (os.path.isdir(Directory + '/Acquired/2D_1')):

```

```
491         os.makedirs(Directory + '/Acquired/2D_1')
492     if int(numofexp) == 3:
493         if not (os.path.isdir(Directory + '/Acquired/2D_2')):
494             os.makedirs(Directory + '/Acquired/2D_2')
495
496
497 TopTRenD()
```
